# Supplementary material for: Reporting and analysis of repeated measurements in preclinical animals experiments
Source: PubMed Central journal article supplement (PMC6690515; doi:10.1371/journal.pone.0220879), 2019-08-12
Supplement: pone.0220879.s003.pdf [file pone.0220879.s003.pdf]

S1 Table. RMA summary

| Studies                | RM Rationale | Materials & Methods |                |                                                    |                |                                       |                 | Results                          |        |       |           |              |           |      |                  |                 |           |     |     |     |     |    |   |
|------------------------|--------------|---------------------|----------------|----------------------------------------------------|----------------|---------------------------------------|-----------------|----------------------------------|--------|-------|-----------|--------------|-----------|------|------------------|-----------------|-----------|-----|-----|-----|-----|----|---|
|                        |              | Normality           | Equal Variance | How RMA described?                                 | # of treatment | Repeated measure                      | # of time point | Outcomes                         | Figure | Table | Precision | Overall test |           |      |                  | Individual Test |           |     |     |     |     |    |   |
|                        |              |                     |                |                                                    |                |                                       |                 |                                  |        |       |           | F value      | Treatment | Time | Treatment x time | Yes/No          | # of test |     |     |     |     |    |   |
| Liu et al.,2014        | no           | no                  | no             | Repeated measurement test                          | 4              | Body weight                           | 7               | body weight                      | yes    | no    | yes       | no           | yes       | no   | no               | no              | 0         |     |     |     |     |    |   |
|                        |              |                     |                |                                                    |                | Locomotion                            | 6               | locomotion                       |        |       |           |              |           |      |                  |                 |           |     |     |     |     |    |   |
|                        |              |                     |                |                                                    |                | Rearing                               | 6               | Rearing                          |        |       |           |              |           |      |                  |                 |           |     |     |     |     |    |   |
|                        |              |                     |                |                                                    |                | Latency                               | 5               | Latency                          |        |       |           |              |           |      |                  |                 |           |     |     |     |     |    |   |
| Whitford et al.,2009   | yes          | no                  | no             | Repeated-measures ANOVA                            | 4              | Number of lever response on FR        | 5               | Group responses per session      | yes    | no    | yes       | no           | yes       | yes  | yes              | no              | 0         |     |     |     |     |    |   |
|                        |              |                     |                |                                                    |                | Efficiency ration for DRL             | 10              | Group efficiency ratios          |        |       |           |              |           |      |                  |                 |           |     |     |     |     |    |   |
| Bera et al.,2007       | no           | no                  | no             | Two way ANOVA for repeated measures                | 3              | Pup weight                            | NA              | Pup weight gain                  | no     | yes   | yes       | no           | yes       | no   | no               | no              | NA        |     |     |     |     |    |   |
|                        |              |                     |                |                                                    |                | Locomotor activity test               | 4               | Locomotor activity test          |        |       |           |              |           |      |                  |                 |           |     |     |     |     |    |   |
|                        |              |                     |                |                                                    |                | Conditioned avoidance response (CARs) | 3               | CARs                             | yes    | yes   | yes       |              |           |      |                  |                 |           | yes | yes | 3   |     |    |   |
|                        |              |                     |                |                                                    |                | Blood pressure                        |                 | Blood pressure                   |        |       | no        |              |           |      |                  |                 |           | no  | NA  | NA  |     |    |   |
| Jin et al.,2008        | no           | yes                 | yes            | (TW-RM-ANOVA)                                      | 15             | Urine volume                          | 3               | Urine volume                     | no     | NA    | no        | no           | yes       | no   | no               | yes             | 3         |     |     |     |     |    |   |
|                        |              |                     |                |                                                    |                | Osmolality                            |                 | osmolality                       |        |       |           |              |           |      |                  |                 |           |     |     |     |     |    |   |
|                        |              |                     |                |                                                    |                | Creatinine                            |                 | Creatinine                       |        |       |           |              |           |      |                  |                 |           |     |     |     |     |    |   |
|                        |              |                     |                |                                                    |                | GGT                                   |                 | GGT                              |        |       |           |              |           |      |                  |                 |           |     |     |     |     |    |   |
| Basha and Sujitha,2012 | no           | no                  | no             | TW-RM-ANOVA                                        | 6              | Mean of correct choices/session       | 9               | Mean of correct choices(session) | yes    | no    | no        | no           | yes       | yes  | yes              | no              | 0         |     |     |     |     |    |   |
|                        |              |                     |                |                                                    |                | Latency change                        | 8               | Latency change                   |        |       |           |              |           |      |                  |                 |           |     |     |     |     |    |   |
| Basha et al.,2011      | no           | no                  | no             | Two-factor ANOVA with RM                           | 7              | Number of alternation                 | NA              | No. of correct choice/10 trials  | no     | no    | no        | no           | yes       | yes  | yes              | no              | 0         |     |     |     |     |    |   |
|                        |              |                     |                |                                                    |                | Latency                               | Latency         |                                  |        |       |           |              |           |      |                  |                 |           |     |     |     |     |    |   |
| Black et al., 2011     | no           | yes                 | yes            | Repeated measures analysis of variance             | 4              | Grip strength                         | 2               | Grip strength                    | yes    | no    | yes       | no           | yes       | no   | no               | no              | 0         |     |     |     |     |    |   |
| Sitting et al.,2012    | no           | no                  | no             | Two-way repeated measures ANOVA                    | 2              | Latency to reach platform             | 4               | Latency to reach platform        | yes    | no    | yes       | no           | yes       | yes  | yes              | yes             | 4         |     |     |     |     |    |   |
|                        |              |                     |                |                                                    |                | Mean swim speed                       |                 | Mean swim speed                  |        |       |           |              |           |      |                  |                 |           |     |     |     |     |    |   |
|                        |              |                     |                |                                                    |                | Distance traveled                     |                 | Distance traveled                |        |       |           |              |           |      |                  |                 |           |     |     |     |     |    |   |
| Liu et al., 2010       | no           | no                  | no             | Test by repeated measure                           | 3              | Escape latency                        | 6               | Escape latency                   | no     | yes   | yes       | no           | yes       | no   | yes              | 6               |           |     |     |     |     |    |   |
| Carvalho et al.,2007   | no           | no                  | no             | Repeated measures and ANOVA                        | 4              | Liquid consumption                    | 17              | Liquid consumption               | no     | no    | yes       | no           | no        | no   | no               | no              | 0         |     |     |     |     |    |   |
|                        |              |                     |                |                                                    |                | Solid consumption                     |                 | Solid consumption                |        |       |           |              |           |      |                  |                 |           |     |     |     |     |    |   |
| Jensen et al.,2013     | no           | no                  | no             | Repeated measures ANOVA                            | 6              | Mean latency (MWM)                    | NA              | Mean latency (MWM)               | yes    | no    | yes       | yes          | yes       | yes  | yes              | no              | 0         |     |     |     |     |    |   |
|                        |              |                     |                |                                                    |                | Mean latency (RMWM)                   | NA              | Mean latency (RMWM)              |        |       |           |              |           |      |                  |                 |           |     |     |     |     |    |   |
| Carlin et al.,2013     | no           | no                  | no             | Repeated measures by time                          | 4              | Maternal weight gain                  | NA              | Maternal weight gain             | no     | yes   | yes       | no           | yes       | no   | yes              | yes             | 3         |     |     |     |     |    |   |
|                        |              |                     |                |                                                    |                | Offspring weight gain                 |                 | Offspring weight gain            |        |       |           |              |           |      |                  |                 |           |     |     |     |     |    |   |
| Ma et al.,2015         | no           | no                  | no             | Repeat measurement test                            | 3              | Body weight                           | 7               | Body weight                      | no     | yes   | no        | no           | no        | no   | no               | no              | no        |     |     |     |     |    |   |
|                        |              |                     |                |                                                    |                | Von Frey hairs test                   | 5               | Withdrawal threshold             |        |       |           |              |           |      |                  |                 |           |     |     |     |     |    |   |
|                        |              |                     |                |                                                    |                | FT                                    | 6               | Finches/10 mins                  | yes    | no    | yes       |              |           |      |                  |                 |           | no  | yes | yes | yes | no | 0 |
|                        |              |                     |                |                                                    |                |                                       |                 | licking time/10 mins             |        |       |           |              |           |      |                  |                 |           |     |     |     |     |    |   |
| Burdge et al.,2008     | no           | yes                 | no             | General linear Model with repeated measures        | 4              | Dam weight                            | 8               | Dam weight                       | yes    | no    | yes       | no           | yes       | yes  | yes              | yes             | 8         |     |     |     |     |    |   |
|                        |              |                     |                |                                                    |                | Litter weight                         | 5               | Litter weight                    |        |       |           |              |           |      |                  |                 |           |     |     |     |     |    |   |
|                        |              |                     |                |                                                    |                | Offspring weight                      | 12              | body weight                      |        |       |           |              |           |      |                  |                 |           |     |     |     |     |    |   |
| Cho et al.,2013        | no           | no                  | no             | PROC MIXED time as the main factors                | 3              | Food intake                           | 13              | Food intake                      | yes    | no    | yes       | no           | yes       | yes  | yes              | no              | 0         |     |     |     |     |    |   |
|                        |              |                     |                |                                                    |                | Body weight gain                      | 28              | Body weight gain                 |        |       |           |              |           |      |                  |                 |           |     |     |     |     |    |   |
|                        |              |                     |                |                                                    |                | Blood glucose response                | 6               | Blood glucose response           |        |       |           |              |           |      |                  |                 |           |     |     |     |     |    |   |
| Cho et al.,2013        | no           | no                  | no             | PROC MIXED time as                                 | 4              | Food intake                           | 13              | Food intake                      | yes    | no    | yes       | no           | yes       | yes  | yes              | no              | 0         |     |     |     |     |    |   |
|                        |              |                     |                |                                                    |                | Body weight gain                      | 28              | Body weight gain                 |        |       |           |              |           |      |                  |                 |           |     |     |     |     |    |   |
| Pannia et al.,2015     | no           | no                  | no             | main factor repeated measures analysis of vairance | 4              | Food intake                           | 14              | Cumulative FI                    | yes    | no    | yes       | no           | yes       | yes  | yes              | no              | 0         |     |     |     |     |    |   |
|                        |              |                     |                |                                                    |                | Pup body weight)                      |                 | Changes in body weight           |        |       |           |              |           |      |                  |                 |           |     |     |     |     |    |   |
| Jiang et al.,2014      | no           | no                  | no             | Repeated mesures design analysis of variance       | 4              | Daily water intake                    | 120             | Daily fluid consumption          | yes    | no    | yes       | no           | yes       | yes  | yes              | yes             | 12        |     |     |     |     |    |   |
|                        |              |                     |                |                                                    |                | Body weight                           | 12              | Body weight                      |        |       |           |              |           |      |                  |                 |           |     |     |     |     |    |   |
|                        |              |                     |                |                                                    |                | Escape Latency                        | 5               | Escape Latency                   |        |       |           |              |           |      |                  |                 |           |     |     |     |     |    |   |
| Bartos et al.,2015     | no           | no                  | no             | Repeated-measures ANOVA                            | 3              | Number of squares                     | 3               | Number of squares                | yes    | no    | yes       | yes          | yes       | yes  | yes              | no              | 0         |     |     |     |     |    |   |
|                        |              |                     |                |                                                    |                | Number of rearings                    |                 | Number of rearings               |        |       |           |              |           |      |                  |                 |           |     |     |     |     |    |   |

|                     |     |    |    |                                                  |   |                       |    |                       |     |    |     |    |     |     |     |     |     |    |
|---------------------|-----|----|----|--------------------------------------------------|---|-----------------------|----|-----------------------|-----|----|-----|----|-----|-----|-----|-----|-----|----|
| Burdge et al., 2009 | yes | no | no | General linear Model with repeated measures      | 4 | Change in Body weight | 9  | Change in Body weight | yes | no | yes | no | no  | no  | yes | yes | 9   |    |
| Day et al., 2005    | yes | no | no | Repeated measures ANOVA                          | 6 | Grip strength in F0   | 4  | Grip strength in F0   | yes | no | yes | no | yes | yes | yes | yes | 4   |    |
|                     |     |    |    |                                                  |   | Grip strength in F1   | 2  | Grip strength in F1   |     |    |     |    |     |     |     | no  | 0   |    |
|                     |     |    |    |                                                  |   | Running wheel in F1   | 3  | Running wheel in F1   |     |    |     |    |     |     |     | yes | yes |    |
| Paletz et al., 2006 | no  | no | no | Univariate (RMA-NOVA)                            | 6 | Response rate         | NA | response rates        | yes | no | yes | no | yes | yes | yes | yes | 15  |    |
|                     |     |    |    |                                                  |   | Response efficiency   | NA | Response efficiency   |     |    |     |    |     |     |     |     | yes | 2  |
| Reed et al., 2006   | no  | no | no | Repeated-measures analysis of variance (RMANOVA) | 6 | Correct               | NA | Correct               | yes | no | yes | no | yes | yes | yes | yes | yes | NA |
|                     |     |    |    |                                                  |   | Errors                |    | Errors                |     |    |     |    |     |     |     |     |     |    |
|                     |     |    |    |                                                  |   | Omission trails       |    | Omission trails       |     |    |     |    |     |     |     |     |     |    |
|                     |     |    |    |                                                  |   | Rearing lever latency |    | Rearing lever latency |     |    |     |    |     |     |     |     |     |    |
|                     |     |    |    |                                                  |   | Choice latency        |    | Choice latency        |     |    |     |    |     |     |     |     |     |    |
