# Supplementary material for: Reporting and analysis of repeated measurements in preclinical animals experiments
Source: PubMed Central journal article supplement (PMC6690515; doi:10.1371/journal.pone.0220879), 2019-08-12
Supplement: pone.0220879.s004.pdf [file pone.0220879.s004.pdf]

S2 Table. NoRMA summary

| Studies                | RM rationale | Materials & Methods |                |                                      |                    |                                                   |                 | Results                                           |        |       |           |                 |                                                       |     |     |     |     |   |
|------------------------|--------------|---------------------|----------------|--------------------------------------|--------------------|---------------------------------------------------|-----------------|---------------------------------------------------|--------|-------|-----------|-----------------|-------------------------------------------------------|-----|-----|-----|-----|---|
|                        |              | Normality           | Equal variance | How Analysis Described               | # of treatment     | Repeated Measures                                 | # of time point | Outcome(s)                                        | Figure | Table | Precision | Individual Test |                                                       |     |     |     |     |   |
|                        |              |                     |                |                                      |                    |                                                   |                 |                                                   |        |       |           | Yes/No          | # of test                                             |     |     |     |     |   |
| Cheng et al., 2009     | no           | no                  | no             | analysis of variance (ANOVA)         | 3                  | Escape latencies                                  | 3               | Escape latencies                                  | yes    | no    | yes       | yes             | 3                                                     |     |     |     |     |   |
| Balayssac et al., 2002 | no           | no                  | no             | analysis of variance                 | 4                  | Withdrawal latency                                | NA              | Withdrawal latency                                | yes    | no    | yes       | yes             | 24_SD rats; 29_Lou/C rats                             |     |     |     |     |   |
|                        |              |                     |                |                                      | Withdraw threshold | Withdraw threshold                                |                 | 16_SD rats; 20_Lou/C rats                         |        |       |           |                 |                                                       |     |     |     |     |   |
| Niu et al., 2009       | no           | no                  | no             | one-way ANOVA                        | 4                  | Learning day Error number Total reaction time     | 4               | Learning day Error number Total reaction time     | no     | yes   | yes       | yes             | 4                                                     |     |     |     |     |   |
| Wu et al., 2006        | no           | no                  | no             | not described                        | 4                  | Error number (1) Error number (2) Sustaining time | 3               | Error number (1) Error number (2) Sustaining time | no     | yes   | yes       | yes             | 3                                                     |     |     |     |     |   |
| Uchikawa et al., 2011  | no           | no                  | no             | Student's t test                     | 3                  | Blood Hg levels                                   | 4               | Blood Hg levels                                   | yes    | no    | yes       | yes             | 4                                                     |     |     |     |     |   |
| Shoostari et al., 2012 | no           | no                  | no             | one-way ANOVA                        | 5                  | Step-through latency                              | 2               | Step-through latency                              | yes    | no    | yes       | yes             | 2                                                     |     |     |     |     |   |
| Folven et al., 2009    | no           | yes                 | yes            | Two-way ANOVA                        | 6                  | Hang/climb score                                  | 6               | Hang/climb score                                  | yes    | no    | yes       | yes             | 4                                                     |     |     |     |     |   |
| Cui et al., 2009       | no           | no                  | no             | One way analysis of variance         | 5                  | Average weight                                    | 5               | Average weight                                    | yes    | no    | yes       | yes             | 5                                                     |     |     |     |     |   |
| Salama et al., 2012    | no           | no                  | no             | one way analysis of variance (ANOVA) | 5                  | Body weight Fluid intake Food intake              | NA              | Body weight gain Fluid intake Food intake         | no     | yes   | yes       | no              | 0                                                     |     |     |     |     |   |
| Dong et al., 2009      | yes          | yes                 | yes            | one way analysis of variance (ANOVA) | 6                  | Body weight Food intake                           |                 | 60                                                |        |       |           |                 | Body weight gain Body weight at end point Food intake | yes | yes | yes | no  | 0 |
|                        |              |                     |                |                                      |                    |                                                   |                 |                                                   |        |       |           |                 |                                                       | no  | yes | yes | yes | 1 |
| Dong et al., 2011      | yes          | yes                 | yes            | one way analysis of variance (ANOVA) | 6                  | Body weight Food intake                           | 60              | Body weight gain Food intake                      | no     | yes   | yes       | no              | 0                                                     |     |     |     |     |   |
|                        |              |                     |                |                                      |                    |                                                   |                 |                                                   |        |       |           | yes             | 1                                                     |     |     |     |     |   |
| Dong et al., 2012      | yes          | yes                 | yes            | one way analysis of variance (ANOVA) | 4                  | Body weight Food intake                           | 60              | body weight gain Food intake in 60th day          | no     | yes   | yes       | no              | 0                                                     |     |     |     |     |   |
|                        |              |                     |                |                                      |                    |                                                   |                 |                                                   |        |       |           | yes             | 1                                                     |     |     |     |     |   |
| Huang et al., 2014     | no           | no                  | no             | Analysis of variance                 | 3                  | body weight Food intake Blood glucose             | 16 13 5         | body weight gain Food intake Blood glucose        | yes    | no    | yes       | yes             | 16 13 5                                               |     |     |     |     |   |
| Farina et al., 2003    | no           | no                  | no             | one-way ANOVA                        | 6                  | Liquid ingestion Body weight                      | 15              | Liquid ingestion Body weight gain                 | no     | yes   | yes       | no              | 0                                                     |     |     |     |     |   |
| Sable et al., 2011     | no           | no                  | no             | one way ANOVA                        | 6                  | Dam body weight Food intake                       | 4 20            | Dam Body weight gain                              | no     | no    | no        | no              | 0                                                     |     |     |     |     |   |
| Sable et al., 2012     | no           | no                  | no             | one way ANOVA                        | 11                 | Body weight Food intake                           | 4 21            | Average pup weight Average daily Food intake      | no     | yes   | yes       | yes             | 4                                                     |     |     |     |     |   |
|                        |              |                     |                |                                      |                    |                                                   |                 |                                                   | no     |       |           | no              | 0                                                     |     |     |     |     |   |
| Joshi et al., 2004     | no           | no                  | no             | One way analysis of variance         | 4                  | Dam weight Pup weight                             | 4 NA            | Dam Weight gain Pup weight                        | no     | yes   | yes       | no              | 0                                                     |     |     |     |     |   |
|                        |              |                     |                |                                      |                    |                                                   |                 |                                                   |        |       |           | yes             | 9                                                     |     |     |     |     |   |
| Field et al., 2006     | no           | no                  | no             | one or two way ANOVA                 | 3                  | Body weight Food intake                           | 10              | Body weight Weight change Food intake             | no     | yes   | yes       | yes             | 1                                                     |     |     |     |     |   |
|                        |              |                     |                |                                      |                    |                                                   |                 |                                                   |        |       |           | no              | 0                                                     |     |     |     |     |   |

|                                  |     |                                  |     |                                      |    |                                   |     |                                    |     |     |     |     |     |
|----------------------------------|-----|----------------------------------|-----|--------------------------------------|----|-----------------------------------|-----|------------------------------------|-----|-----|-----|-----|-----|
| Sarkozi et al., 2015             | yes | yes                              | no  | Parametric one-way ANOVA             | 4  | body weight                       | 72  | body weight                        | yes | no  | no  | yes | 12  |
|                                  |     |                                  |     |                                      |    | Food and water consumption        |     | Food and water consumption         | no  |     | NA  |     | NA  |
|                                  |     |                                  |     |                                      |    | Ambulation distance               |     | Ambulation distance                |     |     |     |     |     |
|                                  |     |                                  |     |                                      |    | Ambulation time                   |     | Ambulation time                    |     |     |     |     |     |
|                                  |     |                                  |     |                                      |    | Ambulation count                  |     | Ambulation count                   |     |     |     |     |     |
|                                  |     |                                  |     |                                      |    | Local activity time               |     | Local activity time                |     |     |     |     |     |
|                                  |     |                                  |     |                                      |    | Local activity count              |     | Local activity count               |     |     |     |     |     |
|                                  |     |                                  |     |                                      |    | Immobility time                   | 3   | Immobility time                    | no  | yes | yes | yes | 3   |
|                                  |     |                                  |     |                                      |    | Immobility count                  |     | Immobility count                   |     |     |     |     |     |
|                                  |     |                                  |     |                                      |    | Rearing time                      |     | Rearing time                       |     |     |     |     |     |
|                                  |     |                                  |     |                                      |    | Rearing count                     |     | Rearing count                      |     |     |     |     |     |
|                                  |     |                                  |     |                                      |    | Percent of time in Corner zones   |     | Percent of time in Corner zones    |     |     |     |     |     |
| Percent of time in Side zones    |     | Percent of time in Side zones    |     |                                      |    |                                   |     |                                    |     |     |     |     |     |
| Percent of time in Central zones |     | Percent of time in Central zones |     |                                      |    |                                   |     |                                    |     |     |     |     |     |
| Beyrouthy and Chan, 2006         | no  | no                               | yes | Analysis of variance                 | 5  | Dam weight in F0                  | NA  | Body weight gain in F0             | no  | yes | yes | no  | 0   |
|                                  |     |                                  |     |                                      |    | Food consumption in F0            |     | Food consumption in F0             |     |     |     |     |     |
|                                  |     |                                  |     |                                      |    | Pup weight in F1                  |     | Pup weight in F1                   |     |     |     |     |     |
| Chmurzynska et al., 2012         | no  | no                               | yes | fixed model ANOVA                    | 4  | Dam food intake                   | NA  | Dam diet consumption               | no  | no  | yes | no  | 0   |
|                                  |     |                                  |     |                                      |    | Dam weight gain                   |     | overall weight gain                |     |     |     |     |     |
|                                  |     |                                  |     |                                      | 8  | Pup food intake                   | 140 | Food intake                        | yes |     |     | yes | 2   |
|                                  |     |                                  |     |                                      |    | Pup weight gain                   | 20  | Pup weight                         |     |     |     |     |     |
| Nassiri-Asl et al., 2011         | no  | no                               | yes | one-way ANOVA                        | 5  | Step through latency              | 3   | Step through latency               | yes | no  | yes | yes | 3   |
| Banji et al., 2013               | no  | no                               | no  | ANOVA                                | 5  | Serum fluoride levels             | 2   | Fluoride levels in serum           | no  | yes | yes | yes | 2   |
|                                  |     |                                  |     |                                      |    | mid-air righting attempts         | 5   | NO, capable of righting in mid air |     |     |     |     | 5   |
| Balaji et al., 2015              | no  | no                               | no  | one-way analysis of variance (ANOVA) | 7  | Body weight                       | 4   | Weekly Body weight                 | no  | no  | NA  | NA  | NA  |
|                                  |     |                                  |     |                                      |    | daily warter/feed intake          | 30  | Warter/feed consumption            |     |     |     |     |     |
| Giudicelli et al., 2013          | no  | no                               | yes | Kruskall-Wallis test                 | 4  | Dam weight                        | NA  | Dam weight                         | no  | yes | yes | yes | 3   |
|                                  |     |                                  |     |                                      |    | Pup weight                        | 93  | Pup weight                         | yes | no  |     |     | 25  |
| Jin et al., 2007                 | yes | yes                              | yes | Two-way ANOVA                        | 15 | Food intake                       | 11  | Food intake                        | yes | yes | yes | no  | 0   |
|                                  |     |                                  |     |                                      |    | body weight                       | 18  | body weight                        |     |     |     |     | yes |
| Ellethey et al., 2010            | no  | no                               | no  | analyses of variance (ANOVA)         | 5  | Body weight                       | 11  | Average body weight gain           | yes | no  | no  | no  | 0   |
|                                  |     |                                  |     |                                      |    | number of squares crossed         | 3   | number of squares crossed          |     |     |     |     |     |
|                                  |     |                                  |     |                                      |    | number of vertical activity       | 3   | number of vertical activity        |     |     |     |     |     |
|                                  |     |                                  |     |                                      |    | Freezing time                     | 3   | Freezing time                      |     |     |     |     |     |
|                                  |     |                                  |     |                                      |    | Latency                           | 5   | Latency                            |     |     |     |     |     |
|                                  |     |                                  |     |                                      |    | Number of entries of blind alleys | 5   | Number of entries of blind alleys  |     |     |     |     |     |
|                                  |     |                                  |     |                                      |    | numbers of rears                  | 2   | numbers of rears                   |     |     |     |     |     |
| numbers of head dips             | 2   | numbers of head dips             |     |                                      |    |                                   |     |                                    |     |     |     |     |     |
| Ekambaram and Paul, 2001         | no  | no                               | no  | one-way analysis of variance (ANOVA) | 4  | Food intake                       | 60  | Average Food intake                | yes | no  | yes | no  | 0   |
|                                  |     |                                  |     |                                      |    | Body weight                       | 2   | Body weight gain                   |     |     |     |     |     |
| Ekambaram et al., 2003           | no  | no                               | no  | one way analysis of variance (ANOVA) | 4  | Food intake                       | 60  | Average Food intake                | yes | no  | yes | no  | 0   |
|                                  |     |                                  |     |                                      |    | Body weight                       | 2   | Body weight gain                   |     |     |     |     |     |

|                          |    |    |     |                                       |   |                             |    |                                           |     |     |     |     |     |    |
|--------------------------|----|----|-----|---------------------------------------|---|-----------------------------|----|-------------------------------------------|-----|-----|-----|-----|-----|----|
| Achon et al., 1999       | no | no | no  | Two-way ANOVA                         | 4 | Dietary intake              | NA | Food intake                               | yes | no  | yes | yes | 9   |    |
|                          |    |    |     |                                       |   | Body weight                 |    | Body weight                               |     |     |     | no  | yes | 10 |
|                          |    |    |     |                                       |   | Fat                         |    | MPU/NPU Nitrogen intake                   |     |     |     |     |     |    |
|                          |    |    |     |                                       |   | Nitrogen                    |    | Fecal nitrogen<br>Urinary nitrogen<br>NDC |     |     |     |     |     | 0  |
| Butenhoff et al., 2004   | no | no | yes | Analysis of variance (ANOVA)          | 5 | Body weight at P1           | 12 | NA                                        | no  | no  | NA  | NA  | NA  |    |
|                          |    |    |     |                                       |   | Feed consumption at P1      |    | Mean pup weight/litter                    | no  | yes | yes | yes | 5   |    |
|                          |    |    |     |                                       |   | Body weight at F1           |    |                                           | NA  |     |     |     |     |    |
|                          |    |    |     |                                       | 5 | Body weight at F2           |    |                                           |     |     |     |     |     |    |
| Marvin et al., 1950      | no | no | no  | Mean+SE                               | 9 | Body weight                 | 4  | Body weight                               | yes | yes | yes | no  | 0   |    |
| Lucena et al., 2007      | no | no | no  | one-way ANOVA                         | 5 | Liquid and solid ingestions | 14 | Liquid and solid ingestions               | NA  | NA  | NA  | NA  | NA  |    |
| Cordero et al., 2013     | no | no | no  | Two-way ANOVA                         | 4 | Fat mass                    | 3  | Body fat mass                             | no  | yes | yes | yes | 1   |    |
| El-Iethy and Kamel, 2011 | no | no | no  | Means of analyses of variance (ANOVA) | 4 | Body weight                 | 15 | Body weight gain                          | no  | yes | yes | no  | 0   |    |
