# Supplementary material for: Reporting and analysis of repeated measurements in preclinical animals experiments
Source: PubMed Central journal article supplement (PMC6690515; doi:10.1371/journal.pone.0220879), 2019-08-12
Supplement: pone.0220879.s005.pdf [file pone.0220879.s005.pdf]

S3 Table. Meta factors data in “BW-dataset”.

| Studies of repeated measure in BW | Repeated measure analysis described? | Category | Year of publication | First 24 months' citations | Journal impact factor in 2016 | Journal impact factor in the published year | Guideline of journal reported? |
|-----------------------------------|--------------------------------------|----------|---------------------|----------------------------|-------------------------------|---------------------------------------------|--------------------------------|
| Burdge et al., 2008               | yes                                  | RMA-BW   | 2008                | 4                          | 3.71                          | 2.76                                        | yes                            |
| Burdge et al., 2009               | yes                                  | RMA-BW   | 2009                | 35                         | 4.14                          | 3.79                                        | yes                            |
| Carlin et al., 2013               | yes                                  | RMA-BW   | 2013                | 12                         | 2.81                          | 3.53                                        | yes                            |
| Cho et al., 2013                  | yes                                  | RMA-BW   | 2013                | 13                         | 4.39                          | 5.11                                        | yes                            |
| Cho et al., 2013                  | yes                                  | RMA-BW   | 2013                | 6                          | 5.49                          | 5.39                                        | yes                            |
| Liu et al., 2014                  | yes                                  | RMA-BW   | 2014                | 4                          | 2.34                          | 3.03                                        | yes                            |
| Jiang et al., 2014                | yes                                  | RMA-BW   | 2014                | 9                          | 2.81                          | 3.23                                        | yes                            |
| Ma et al., 2015                   | yes                                  | RMA-BW   | 2015                | 3                          | 2.05                          | 2.38                                        | no                             |
| Pannia et al., 2015               | yes                                  | RMA-BW   | 2015                | 1                          | 3.00                          | 3.00                                        | yes                            |
| Ekambarma and Paul, 2001          | no                                   | NoRMA-BW | 2001                | 0                          | 1.34                          | 0.91                                        | yes                            |
| Ekambaram et al., 2003            | no                                   | NoRMA-BW | 2003                | 0                          | 2.31                          | 1.27                                        | yes                            |
| Farina et al., 2003               | no                                   | NoRMA-BW | 2003                | 4                          | 3.86                          | 2.22                                        | yes                            |
| Joshi et al., 2004                | no                                   | NoRMA-BW | 2004                | 2                          | 3.42                          | 1.96                                        | yes                            |
| Butenhoff et al., 2004            | no                                   | NoRMA-BW | 2004                | 0                          | 3.58                          | 2.06                                        | yes                            |
| Beyrouthy and Chan, 2006          | no                                   | NoRMA-BW | 2006                | 6                          | 2.41                          | 2.14                                        | yes                            |
| Field et al., 2006                | no                                   | NoRMA-BW | 2006                | 0                          | 4.52                          | 2.94                                        | no                             |
| Jin et al., 2007                  | no                                   | NoRMA-BW | 2007                | 7                          | 3.58                          | 2.92                                        | yes                            |
| Niu et al., 2009                  | no                                   | NoRMA-BW | 2009                | 2                          | 2.31                          | 1.29                                        | yes                            |
| Cui et al., 2009                  | no                                   | NoRMA-BW | 2009                | 1                          | 2.47                          | 1.74                                        | no                             |
| Dong et al., 2009                 | no                                   | NoRMA-BW | 2009                | 6                          | 2.47                          | 1.74                                        | no                             |
| Dong et al., 2011                 | no                                   | NoRMA-BW | 2011                | 2                          | 2.47                          | 1.93                                        | yes                            |
| Sable et al., 2011                | no                                   | NoRMA-BW | 2011                | 4                          | 3.28                          | 3.38                                        | no                             |
| Sable et al., 2012                | no                                   | NoRMA-BW | 2012                | 8                          | 3.28                          | 3.12                                        | no                             |
| Chmurzynska et al., 2012          | no                                   | NoRMA-BW | 2012                | 1                          | 2.80                          | 3.33                                        | yes                            |
| Dong et al., 2012                 | no                                   | NoRMA-BW | 2012                | 2                          | 3.79                          | 3.98                                        | yes                            |
| Salama et al., 2012               | no                                   | NoRMA-BW | 2013                | 0                          | 1.38                          | 1.55                                        | yes                            |
| Giudicelli et al., 2013           | no                                   | NoRMA-BW | 2013                | 2                          | 2.81                          | 3.53                                        | yes                            |
| Huang et al., 2014                | no                                   | NoRMA-BW | 2014                | 12                         | 3.23                          | 2.86                                        | yes                            |
| Balaji et al., 2015               | no                                   | NoRMA-BW | 2015                | 1                          | 1.38                          | 1.55                                        | yes                            |
| Sarkozi et al., 2015              | no                                   | NoRMA-BW | 2015                | 1                          | 1.49                          | 1.58                                        | no                             |
| Bartos et al., 2015               | no                                   | NoRMA-BW | 2015                | 2                          | 2.34                          | 2.46                                        | yes                            |
