# Supplementary material for: Reporting and analysis of repeated measurements in preclinical animals experiments
Source: PubMed Central journal article supplement (PMC6690515; doi:10.1371/journal.pone.0220879), 2019-08-12
Supplement: pone.0220879.s006.pdf [file pone.0220879.s006.pdf]

**S4 Table. The meta-factors association analysis for the “BW-dataset”.**

| Categories                                  | RMA-BW    |      |       | NoRMA-BW  |      |      | RMA-BW vs NoRMA-BW            |
|---------------------------------------------|-----------|------|-------|-----------|------|------|-------------------------------|
|                                             | Range     | Mean | SD    | Range     | Mean | SD   | Wilcoxon Test <i>p</i> -value |
|                                             | P value   |      |       |           |      |      |                               |
| Year of publication                         | 2008-2015 | 2013 | 2.5   | 2001-2015 | 2009 | 4.4  | 0.0396                        |
| The first 24 months' citations              | 1-35      | 9.67 | 10.34 | 0-12      | 2.86 | 3.15 | 0.096                         |
| Journal impact factor in 2016               | 2.05-5.49 | 3.41 | 1.11  | 1.34-4.52 | 2.75 | 0.88 | 0.1632                        |
| Journal impact factor in the published year | 0.91-3.98 | 3.58 | 1.03  | 2.38-5.39 | 2.29 | 0.84 | 0.0047                        |
